# Supplementary material
Source: PubMed Central journal article supplement (PMC6481637)
Supplement: NIHMS963549-supplement-1.pdf [file NIHMS963549-supplement-1.pdf]

*Supplementary Appendix: Coding algorithm*

Our initial coding algorithm to define reintervention events after EVAR included 42 ICD-9 diagnosis codes and 24 ICD-9 procedure codes (Supplementary Table 1). We defined a reintervention event in Medicare claims as any patient having one of these billing codes appear in their Medicare claims file after their index procedure. We allowed either an ICD-9 diagnosis code (which was the primary diagnosis code for the admission) or an ICD-9 procedure code to represent a reintervention event. These were not considered mutually exclusive, so that an ICD-9 primary diagnosis code also found with an ICD-9 procedure code during the same admission was considered a single reintervention event. Although it included subcodes which were not specific to vascular procedures, we felt it important to initially include procedure code 9966.x to capture potentially miscoded events. Code 9957 was included for a similar reason.

Using the original coding algorithm, the VQI-Medicare linked data identified 65 events during the first year following EVAR (Supplementary Table 3). We then compared the VQI-Medicare identified events with the reintervention events found on chart review. We conducted telephone interviews if the clinical outcome could not be adequately determined on chart review. If a patient died during a hospital admission at another institution and that admission was connected with one of the billing codes in our algorithm, we assumed that the death was aneurysm-related and associated with an attempted reintervention. This was done to provide the most conservative estimate of events. While we considered records from all hospitals that had been entered into the patients available medical record, we did not visit outside institutions to perform additional chart reviews. We did not attempt telephone interviews to assess for reintervention events in deceased patients.

Billing codes with an accuracy lower than 50% were considered for removal from the coding algorithm (Supplementary Table 2). For example, procedure code 3893 was associated with a true clinical reintervention event in 1 of 21 cases, this code was therefore removed from our list of codes chosen to represent a reintervention event. If a code only appeared once, however, we did not feel that this provided adequate information to remove it from the algorithm. Therefore, codes only appearing once, even if not associated with a clinical event, were kept in the algorithm. We also removed codes with 50% accuracy that were associated with another code that consistently performed well. For example, diagnosis code 44422 was associated with a true reintervention event in 1 of 2 cases. However, that reintervention event was also associated with procedure code 3929, a code which was associated a true event in 5/5 cases. We therefore removed diagnosis code 44422 from the coding algorithm. The rate of reintervention using the VQI-Medicare data was then recalculated using the revised list of billing codes.

**Supplementary Table 1: Codes used to identify reintervention after EVAR: Baseline coding algorithm.**

| <i>Code</i>           | <i>Definition</i>                               |
|-----------------------|-------------------------------------------------|
| ICD-9 Procedure codes |                                                 |
| 3804                  | incision of vessel, aorta                       |
| 3806                  | incision of vessel, abdominal artery            |
| 3808                  | incision of vessel, lower limb artery           |
| 3814                  | endarterectomy of aorta                         |
| 3816                  | endarterectomy of abdominal arteries            |
| 3818                  | endarterectomy of lower limb arteries           |
| 3834                  | resection of vessel with anastomosis            |
| 3838                  | resection of lower limb arteries w/anastomosis  |
| 3844                  | resection of abdominal aorta w/replacement      |
| 3846                  | resection of abdominal arteries w/replacement   |
| 3848                  | resection of lower limb arteries w/replacement  |
| 3864                  | other excision of vessels, aorta, abdominal     |
| 3866                  | other excision of abdominal arteries            |
| 3868                  | other excision of lower limb arteries           |
| 3884                  | other surgical occlusion of abdominal aorta     |
| 3886                  | other surgical occlusion of abdominal arteries  |
| 3888                  | other surgical occlusion of lower limb arteries |
| 3891                  | arterial catheterization                        |
| 3893                  | venous catheterization not elsewhere classified |
| 3925                  | aorta-iliac-femoral bypass                      |
| 3926                  | other intra-abdominal vascular shunt or bypass  |
| 3929                  | other (peripheral) vascular shunt or bypass     |
| 3930                  | suture of unspecified blood vessel              |
| 3931                  | suture of artery                                |

- 3950 angioplasty/atherectomy of other non-coronary vessel(s)
- 3951 clipping of aneurysm
- 3952 other repair of aneurysm
- 3954 re-entry operation (aorta)
- 3956 repair of blood vessel w/tissue patch graft
- 3957 repair of blood vessel w/synthetic patch graft
- 3958 repair blood vessel w/unspecified type patch graft
- 3959 other repair of vessel
- 3971 endovascular implantation graft abdominal aorta
- 3972 endovascular repair/occlusion head & neck vessels
- 3973 endovascular implantation graft thoracic aorta
- 3974 endovascular removal obstruction head & neck vessels
- 3975 endovascular embolization or occlusion
- 3976 endovascular embolization or occlusion
- 3977 temporary treatment endovascular occlusion vessel
- 3978 endovascular implant aortic branch graft
- 3979 other endovascular repair of other vessels
- 3990 insertion non-drug-eluting peripheral vessel stents

#### ICD-9 Diagnosis codes

- 4413 abdominal aortic aneurysm, ruptured
- 4415 aortic aneurysm of unspecified site, ruptured
- 4400 atherosclerosis of aorta
- 4442 embolism & thrombosis arteries of the extremities
- 44421 embolism & thrombosis arteries upper extremity
- 44422 embolism & thrombosis arteries lower extremity
- 4448 embolism & thrombosis of other specified artery
- 44481 embolism & thrombosis of iliac artery
- 44489 embolism & thrombosis of other specified artery
- 9957 other adverse food reactions, other

- 9961 mechanical complications other vascular device implant & graft
- 99659 mechanical complication due to other implant and internal device, not elsewhere classified
- 9966 infection & inflammatory reaction due to internal prosthetic device implant & graft
- 99660 infection & inflammatory reaction due to unspecified device implant & graft
- 99661 infection & inflammatory reaction due to cardiac device implant & graft
- 99662 infection & inflammatory reaction due to other vascular device implant & graft
- 99663 infection & inflammatory reaction due to nervous system device implant & graft
- 99664 infection & inflammatory reaction due to indwelling urinary catheter
- 99665 infection & inflammatory reaction due to other genitourinary device implant & graft
- 99666 infection & inflammatory reaction due to internal joint prosthesis
- 99667 infection & inflammatory reaction due to other internal orthopedic device implant & graft
- 99668 infection & inflammatory reaction due to peritoneal dialysis catheter
- 99669 infection & inflammatory reaction due to other internal prosthetic device implant & graft
- 99674 other complications due to other vascular device implant & graft

---

Legend: EVAR, endovascular aneurysm repair; ICD-9, international classification of diseases, ninth revision.

**Supplementary Table 2:** Changes to the coding algorithm based on chart review.

| <i>Code</i>            | <i>Definition</i>                                                                         | <i>Chart review events</i> | <i>Times appearing</i> | <i>Decision</i> | <i>Justification</i>                                    |
|------------------------|-------------------------------------------------------------------------------------------|----------------------------|------------------------|-----------------|---------------------------------------------------------|
| <b>Diagnosis codes</b> |                                                                                           |                            |                        |                 |                                                         |
| 4400                   | atherosclerosis of aorta                                                                  | 0                          | 1                      | Keep            | Appeared once                                           |
| 4413                   | abdominal aortic aneurysm, ruptured                                                       | 1                          | 3                      | Keep            | Add modifier, drop if days to event <1                  |
| 9961                   | mechanical complications due to other vascular device implant & graft                     | 17                         | 17                     | Keep            | Correct all times                                       |
| 44422                  | Embolism & thrombosis arteries, lower extremity                                           | 1                          | 2                      | Drop            | Correct only when found with 3929                       |
| 99669                  | Infection & inflammation reaction due to other internal prosthetic device implant & graft | 1                          | 1                      | Keep            | Appeared once                                           |
| 99674                  | other complications due to other vascular device implant & graft                          | 7                          | 7                      | Keep            | Correct all times                                       |
| <b>Procedure codes</b> |                                                                                           |                            |                        |                 |                                                         |
| 3806                   | incision of vessel, abdominal artery                                                      | 1                          | 1                      | Keep            | Appeared once                                           |
| 3818                   | endarterectomy of lower limb arteries                                                     | 1                          | 1                      | Keep            | Appeared once                                           |
| 3834                   | resection of vessel with anastomosis                                                      | 0                          | 1                      | Keep            | Appeared once                                           |
| 3848                   | resection of lower limb arteries w/replacement                                            | 0                          | 2                      | Drop            | Incorrect both times                                    |
| 3893                   | venous catheterization not elsewhere classified                                           | 1                          | 21                     | Drop            | Correct once when found with 99612                      |
| 3929                   | other (peripheral) vascular shunt or bypass                                               | 5                          | 5                      | Keep            | Correct all times                                       |
| 3950                   | Angioplasty/atherectomy non-coronary vessel(s)                                            | 3                          | 8                      | Drop            | Correct when found with 9961, 99674 in two of the cases |
| 3952                   | other repair of aneurysm                                                                  | 0                          | 1                      | Keep            | Appeared once                                           |
| 3971                   | endovascular implantation of graft abdominal aorta                                        | 7                          | 8                      | Keep            | Correct in most cases                                   |
| 3973                   | endovascular implantation of graft thoracic aorta                                         | 0                          | 2                      | Drop            | Incorrect both times                                    |
| 3979                   | other endovascular repair of other vessels                                                | 6                          | 6                      | Keep            | Correct all times                                       |

**Supplementary Table 3:** Reintervention events occurring within the first year in Medicare: Baseline coding algorithm.

| <i>Diagnosis code</i> | <i>Procedure code</i> | <i>Clinical event</i>                                | <i>Chart review event</i> | <i>Found in VQI</i> |
|-----------------------|-----------------------|------------------------------------------------------|---------------------------|---------------------|
| 9961                  | 3979                  | EVAR limb extension                                  | Yes                       | Yes                 |
| 9961                  |                       | Proximal aortic cuff                                 | Yes                       | Yes                 |
| 9961                  | 3971                  | Proximal aortic cuff                                 | Yes                       | Yes                 |
| 99674                 | 3929                  | Femoral-femoral bypass for EVAR limb occlusion       | Yes                       | Yes                 |
|                       | 3971                  | Proximal aortic cuff and renal stent implantation    | Yes                       | Yes                 |
| 9961                  | 3979                  | Translumbar coiling of endoleak                      | Yes                       | Yes                 |
| 9961                  |                       | EVAR limb thrombectomy                               | Yes                       | Yes                 |
|                       | 3950                  | EVAR limb distal extension                           | Yes                       | Yes                 |
| 9961                  | 3971                  | Proximal aortic cuff                                 | Yes                       | Yes                 |
| 99674                 | 3929                  | Femoral-femoral bypass for EVAR limb occlusion       | Yes                       | Yes                 |
| 9961                  | 3971                  | Proximal aortic cuff and renal stent                 | Yes                       | Yes                 |
| 9961                  | 3979                  | Transcaval coiling of endoleak                       | Yes                       | Yes                 |
| 99674                 | 3979                  | EVAR limb thrombectomy and complete relining of EVAR | Yes                       | No                  |
| 9961                  | 3971                  | Proximal aortic cuff                                 | Yes                       | No                  |
| 9961                  | 3971                  | Proximal aortic cuff                                 | Yes                       | No                  |
| 9961                  | 3979                  | Transfemoral coiling of endoleak                     | Yes                       | No                  |
| 9961                  | 3893                  | Attempted transcaval coiling of endoleak             | Yes                       | No                  |
| 99674                 | 3979                  | EVAR limb thrombectomy                               | Yes                       | No                  |
| 99674                 | 3929                  | Fememoral-femoral bypass for EVAR limb occlusion     | Yes                       | No                  |
| 9961                  |                       | Attempted recanalization of renal chimney            | Yes                       | No                  |
| 9961                  | 3971                  | Proximal aortic cuff                                 | Yes                       | No                  |
| 99674                 | 3806                  | EVAR limb thrombectomy                               | Yes                       | No                  |
| 9961                  |                       | Attempted coiling of endoleak                        | Yes                       | No                  |
| 9961                  | 3950                  | Repair of kinked EVAR                                | Yes                       | No                  |

|       |      |                                                                                    |     |    |
|-------|------|------------------------------------------------------------------------------------|-----|----|
| 99674 | 3950 | Reconstruction for exposed AUI and femoral-femoral bypass                          | Yes | No |
| 44422 | 3929 | Femoral-femoral bypass for EVAR limb occlusion                                     | Yes | No |
|       | 3818 | Femoral reconstruction for new short distance claudication after percutaneous EVAR | Yes | No |
| 9961  |      | Deceased at outside hospital, unknown cause                                        | Yes | No |
|       | 3929 | Deceased at outside hospital, unknown cause                                        | Yes | No |
| 4413  |      | Deceased at outside hospital, unknown cause                                        | Yes | No |
| 4413  | 3834 | No reintervention, no rupture                                                      | No  | No |
| 44422 | 3848 | Popliteal aneurysm repair                                                          | No  | No |
|       | 3848 | Popliteal aneurysm repair                                                          | No  | No |
|       | 3893 | Tunneled dialysis catheter placement                                               | No  | No |
|       | 3893 | PICC line placement                                                                | No  | No |
|       | 3893 | PICC line placement                                                                | No  | No |
|       | 3893 | PICC line placement                                                                | No  | No |
|       | 3893 | LTF                                                                                | No  | No |
|       | 3893 | No reintervention, no rupture                                                      | No  | No |
|       | 3893 | PICC line placement                                                                | No  | No |
|       | 3893 | LTF                                                                                | No  | No |
|       | 3893 | No reintervention, no rupture                                                      | No  | No |
|       | 3893 | ICD and pacemaker placement                                                        | No  | No |
|       | 3893 | LTF                                                                                | No  | No |
|       | 3893 | LTF                                                                                | No  | No |
|       | 3893 | Central line placement                                                             | No  | No |
|       | 3893 | No reintervention, no rupture                                                      | No  | No |
|       | 3893 | No reintervention, no rupture                                                      | No  | No |
|       | 3893 | Central line placement                                                             | No  | No |
|       | 3893 | No reintervention, no rupture                                                      | No  | No |
|       | 3893 | Temporary pacer wire placement                                                     | No  | No |
|       | 3893 | Central line placement                                                             | No  | No |



|       |      |                                             |    |    |
|-------|------|---------------------------------------------|----|----|
|       | 3893 | Groin lymphocele, non-operative management  | No | No |
|       | 3950 | No reintervention, no rupture               | No | No |
|       | 3950 | Renal artery stent                          | No | No |
|       | 3950 | No reintervention, no rupture               | No | No |
|       | 3950 | No reintervention, no rupture               | No | No |
|       | 3950 | Revisions to a peripheral bypass graft      | No | No |
|       | 3952 | No reintervention, no rupture               | No | No |
|       | 3971 | No reintervention, no rupture               | No | No |
|       | 3973 | Ruptured thoracic aortic aneurysm           | No | No |
|       | 3973 | TEVAR                                       | No | No |
| 4400  |      | Coronary stent                              | No | No |
| 4413  |      | No reintervention, index repair for rupture | No | No |
| 99669 |      | No reintervention, no rupture               | No | No |

---

Legend: EVAR, endovascular aneurysm repair; PICC, peripherally inserted central catheter; LTF, lost to follow up; ICD, implantable cardioverter defibrillator; TEVAR, thoracic endovascular aneurysm repair.
